# 1 SARS-CoV-2 Surveillance in US Wastewater: Leading Indicators and 2 Data Variability Analysis in the 2023-2024 Season

3

4 **Authors:** Hannes Schenk<sup>(1,2)</sup>, Wolfgang Rauch<sup>(2)</sup>, Alessandro Zulli<sup>(1)</sup>, Alexandria B. Boehm<sup>(1\*)</sup>

## 5 **Affiliations:**

6 (1) Department of Civil & Environmental Engineering, School of Engineering and Doerr School of  
7 Sustainability, Stanford University, Stanford, CA, USA

8 (2) Unit of Environmental Engineering, University of Innsbruck, Technikerstraße 13, Innsbruck 6020,  
9 Austria

10 \* corresponding author: Alexandria Boehm (aboehm@stanford.edu)

11

12 **Keywords:** SARS-CoV-2, Wastewater-Based Epidemiology, COVID-19 2023-2024

13 **Abstract:** Wastewater-Based Epidemiology (WBE) has become a powerful tool for assessing disease  
14 occurrence in communities. This study investigates the coronavirus disease 2019 (COVID-19) epidemic  
15 in the United States during the 2023-2024 season using wastewater data from 189 wastewater treatment  
16 plants in 40 states and the District of Columbia. Severe acute respiratory syndrome coronavirus 2  
17 (SARS-CoV-2) and pepper-mild mottle virus normalized SARS-CoV-2 concentration data were  
18 compared with COVID-19 hospitalization admission data at both national and state levels. We further  
19 investigate temporal features in wastewater viral abundance, with peak timing and cross-correlation lag  
20 analyses indicating that wastewater SARS-CoV-2 concentrations precede hospitalization admissions by  
21 2 to 12 days. Lastly, we demonstrate that wastewater treatment plant size, assessed by number of  
22 population served, has a significant effect on the variability of measured SARS-CoV-2 concentrations.  
23 This study highlights the effectiveness of WBE as a non-invasive, timely and resource-efficient disease  
24 monitoring strategy, especially in the context of declining COVID-19 clinical reporting.

25

## 26 1. Introduction

27 On 30 January 2020, the World Health Organization (WHO) declared the coronavirus disease 2019  
28 (COVID-19) outbreak a public health emergency of international concern [1]. Three years and three  
29 months later, the WHO declared the end of the public health emergency, despite Severe acute  
30 respiratory syndrome coronavirus (SARS-CoV-2) infections remaining a leading cause of death  
31 worldwide and in the United States (US). Even with the availability of vaccines and therapeutic

32 treatments in the US, SARS-CoV-2 was responsible for a reported 49,931 deaths in 2023,  
33 highlighting the need to understand COVID-19 disease burden to inform public health policies [2].  
34 While clinical data remain the standard for tracking disease burden, maintaining testing on a large  
35 scale is resource intensive, fails to detect asymptomatic cases and relies on the compliance of the  
36 public [3]. Wastewater-based epidemiology (WBE) provides a supplementary monitoring option  
37 that helps fill knowledge gaps such as undetected community spread, asymptomatic cases, and the  
38 lag in clinical reporting [4–6]. Human shedding of pathogens and chemicals into wastewater  
39 provides an important source of information on the health of the entire community living in a  
40 catchment area [7]. As an established surveillance method, WBE contributed to the management of  
41 the COVID-19 pandemic early on. Medema *et al.* [8], Ahmed *et al.* [9] among others ([10–14]) laid  
42 out the foundational work for SARS-CoV-2 surveillance using wastewater. While clinical testing  
43 efforts have decreased, WBE remains a central technology in monitoring SARS-CoV-2 in the  
44 population, as well as increasing in use for the detection of other pathogens [15–18].  
45 Timely epidemiological data are crucial for assessing infectious disease outbreaks and  
46 implementing the necessary public health interventions. Both clinical testing data and hospital  
47 admission data correlate strongly to viral concentrations in wastewater, with wastewater leading  
48 both clinical testing and hospitalization data [14, 19–22]. WBE as an early warning system has been  
49 discussed in literature thoroughly [23, 24]. A streamlined process of logistics, sample analysis and  
50 data reporting are critical to leverage the temporal advantages of WBE. Understanding the lead  
51 times of WBE data is critical for the construction of forecasting models.  
52 In this study the 2023-2024 COVID-19 epidemic in the US is investigated by analyzing longitudinal  
53 measurements of SARS-CoV-2 RNA in wastewater from 189 wastewater treatment plants  
54 (WWTPs) throughout the US. The data are aggregated on several spatial levels to compare to data  
55 on COVID-19 hospitalizations in 10 states. This paper's novelty lies in its extensive dataset from  
56 WWTPs across the US, providing a comprehensive nationwide analysis of the 2023-2024 post-  
57 pandemic period. We then investigate leading or lagging behavior by comparing peak timings and  
58 computing maximum cross-correlation coefficients. Lastly, we demonstrate that SARS-CoV-2

59 RNA concentration variability is a function of WWTP size, offering new insights into the influence  
60 of WWTP size on the underlying dynamics.

61  
62 2. Methods

63 2.1. Viral quantification and data characterization

64 For this study, wastewater data and hospitalization data are analyzed. COVID-19 hospitalization  
65 data are publicly available from the Centers for Disease Control and Prevention (CDC) [2]. State-  
66 aggregated, daily hospitalization data consists of data on COVID-19 occupancy and admission  
67 numbers. The wastewater data used in this study were retrieved through the nucleic acid extraction  
68 of settled solids from WWTPs nationwide. In June 2024 a total of 189 treatment plants were  
69 monitoring SARS-CoV-2 RNA in 40 different states throughout the US using a consistent approach  
70 by a single laboratory. Wastewater composite samples are collected with a sample frequency of 2  
71 to 3 times per week for most plants, while some plants collect samples up to 7 times per week.  
72 Settled solids were extracted after dewatering by centrifugation at 24,000 x g for 30 minutes [25].  
73 Solids were resuspended in DNA/RNA shield to a concentration of 75 mg/mL. Bovine coronavirus  
74 (BCoV) was used as a positive recovery control in all samples. Extraction was performed using a  
75 Chemagic Viral DNA/RNA 300 kit H96 in conjunction with a Perkin Elmer Chemagic 360  
76 (Chemagic #CMG-1033-S). Inhibitor removal was performed using a Zymo OneStep-96 PCR  
77 Inhibitor removal kit (Zymo Research #D6035). Extraction negative controls and positive controls  
78 were extracted simultaneously. SARS-CoV-2 digital droplet RT-PCR was performed using primers  
79 and probes previously described [25]. BCoV and pepper-mild mottle virus were quantified in a  
80 duplex assay in each sample as controls. Each sample was run in 6 to 10 replicate wells and merged  
81 before analysis [26]. In the study period between 1<sup>st</sup> of May 2023 and 1<sup>st</sup> of June 2024, a total of  
82 29,364 daily samples were examined. Readers are directed to a Data Descriptor for a full description  
83 of the SARS-CoV-2 measurements methods [27].

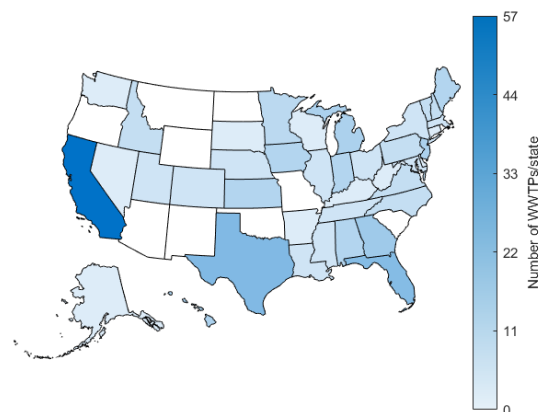

84  
 85 **Figure 1:** Map of the US. Shading indicates the number of WWTPs contributing to WBE in each state.  
 86 Figure 1 illustrates a map of the US, highlighting the number of WWTPs participating in SARS-  
 87 CoV-2 RNA wastewater surveillance for the project. California, Texas, and Florida are the states  
 88 with the highest number of contributing WWTPs, with 57, 14, and 13 plants respectively. Overall,  
 89 40 states have at least one WWTP monitoring SARS-CoV-2. Table 1 provides a detailed list of the  
 90 states in the US, including the number of WWTPs contributing to the study. It also includes the total  
 91 population served and the percentage of population coverage in each state.

92 **Table 1:** Number of WWTPs by state and percentage of population covered.

| State | #WWTPs | Pop. served/10 <sup>3</sup> | Pop. coverage % | State | #WWTPs | Pop. served/10 <sup>3</sup> | Pop. coverage % |
|-------|--------|-----------------------------|-----------------|-------|--------|-----------------------------|-----------------|
| CA    | 57     | 20,511                      | 52.6            | UT    | 2      | 715                         | 20.9            |
| TX    | 14     | 2,425                       | 7.9             | TN    | 2      | 700                         | 9.8             |
| FL    | 13     | 3,650                       | 16.1            | OH    | 2      | 539                         | 4.6             |
| GA    | 8      | 1,109                       | 10.1            | LA    | 2      | 383                         | 8.4             |
| NJ    | 6      | 1,882                       | 20.3            | NE    | 2      | 300                         | 15.2            |
| HI    | 6      | 858                         | 59.8            | IL    | 2      | 149                         | 32.7            |
| MI    | 6      | 482                         | 4.8             | MD    | 2      | 145                         | 1.2             |
| AL    | 5      | 627                         | 12.3            | NY    | 2      | 120                         | 2.3             |
| IN    | 5      | 322                         | 4.7             | CO    | 2      | 60                          | 0.6             |
| KS    | 5      | 267                         | 9.1             | MS    | 2      | 53                          | 1.0             |
| ME    | 5      | 185                         | 13.3            | NV    | 1      | 990                         | 1.8             |
| IA    | 5      | 129                         | 4.0             | KY    | 1      | 423                         | 31.0            |
| MN    | 4      | 326                         | 5.7             | AK    | 1      | 220                         | 9.4             |
| PA    | 3      | 361                         | 2.8             | CT    | 1      | 140                         | 3.9             |
| ID    | 3      | 345                         | 17.6            | WV    | 1      | 100                         | 5.6             |
| NC    | 3      | 167                         | 3.1             | WI    | 1      | 44                          | 0.7             |
| VA    | 3      | 153                         | 1.8             | SD    | 1      | 20                          | 2.2             |
| NH    | 3      | 79                          | 5.6             | AR    | 1      | 15                          | 0.5             |
| VT    | 3      | 56                          | 8.7             | DE    | 1      | 13                          | 1.3             |
| MA    | 2      | 2,650                       | 37.8            | WA    | 1      | 10                          | 0.1             |

93  
94  
95  
96  
97  
98  
99  
100  
101

## 2.2. Data Pretreatment

SARS-CoV-2 (SC2) RNA and pepper-mild mottle virus (PMMoV) RNA concentrations were measured with digital droplet RT-PCR and reported as gene copies per gram dry weight. PMMoV is shed by humans in great abundance following the consumption of bell pepper and other pepper products [28]. Dividing SC2 by PMMoV concentrations compensates for the diversity of fecal strength of waste stream. This concept follows the mass balance model that relates concentrations of SARS-CoV-2 RNA in wastewater solids to incident infections of individuals in the sewershed [29]. The PMMoV normalized SC2 concentration is computed as follows:

$$SC2_{PMMoV} = \frac{SC2}{PMMoV} \quad (1)$$

102  
103  
104  
105  
106  
107  
108

Before the spatial aggregation of WBE data, raw data were examined for outliers. Wastewater data are marked by random and systematic errors. Random errors are immanent to the technique of WBE and are caused with heterogeneities in the environmental sample and processes that affect concentrations in the sample; these can be difficult to reduce. Systematic errors are caused by a failure in the measurement process. With the outlier removal approach in this work, systematic errors are targeted. Concentrations larger than 3 standard deviations above the  $\log_{10}$  transformed mean of the entire dataset ( $n=29,364$ ) are discarded.

109  
110  
111  
112  
113  
114  
115  
116  
117

## 2.3. Spatial data aggregation

In order to compare wastewater data with hospitalization levels on a state by state basis (or on national scale), the SC2 concentration measurements were spatially aggregated. The spatial aggregation for WBE data in a state is performed by computing weighted daily averages of all WWTPs that provided data at a given date in that state, where the weighting factor is the population size that each plant serves. This computation results in a representative daily average of the SC2 circulation in the state, where the size of the plant is taken into consideration accordingly. The state aggregated daily weighted averages are calculated by

$$SC2_{PMMoV,S}(d) = \left( \sum_{i=1}^P SC2_{PMMoV,i}(d) * pop_i \right) / \sum_{i=1}^P pop_i \quad (2)$$

118  
119

where the summation over the  $P$  indicates the plants in state  $S$  and  $pop_i$  denotes the population served by plant  $i$ . Analogous to the spatial aggregation on a state level, national weighted daily averages

120 are computed by utilizing all available plants in the US. To obtain gapless time-series for the  
121 temporal analysis of the data, linear interpolation is performed if no datapoint is available at a given  
122 day after spatial aggregation.

#### 123 124 2.4. Temporal analysis

125 The temporal features of SC2 normalized by PMMoV concentrations in wastewater are investigated  
126 in this study and compared on a state by state basis to hospitalization admission. The association  
127 between WBE data and hospitalization admission is determined using two approaches. First, cross-  
128 correlation function analysis (CCF) and second by examining the peak timing of the waves. Waves  
129 are periodic surges or peaks in the concentration of SC2<sub>PMMoV</sub> over time. These waves represent  
130 fluctuations in SARS-CoV-2 RNA concentrations in wastewater. Furthermore, Spearman  
131 correlation  $r$  is examined to outline the qualitative relation between the time series.

132 Peak timing in time series provides a good reference point for comparison. The COVID-19 epidemic  
133 in the US in the season 2023-2024 is characterized by two local peaks. A smaller peak in fall 2023  
134 and a more pronounced peak in December/January. In this work the peak timings for hospitalization  
135 admission and SC2<sub>PMMoV</sub> in wastewater are compared relative to one another on a state by state  
136 basis. Peaks are determined by locating the highest values of the 7-day moving mean of the  
137 SC2<sub>PMMoV</sub> concentrations in wastewater and hospitalization admission time-series. The peaks are  
138 determined for both occurring waves, where the 1<sup>st</sup> of November is the date of separation between  
139 first and second wave. This date was chosen by visual inspection of the data and allows for a good  
140 separation of the two peaks for all states. The average time differential  $\overline{\Delta t}$  is then calculated by  
141 averaging the difference between peak occurrences of the two peaks for each state.  $\overline{\Delta t}$  is calculated  
142 by

$$\overline{\Delta t}_s = \frac{\Delta t_{peak\_1,S} + \Delta t_{peak\_2,S}}{2} \quad (3)$$

143 where  $\Delta t_{peak\_1,S}$  and  $\Delta t_{peak\_2,S}$  denote the time difference in days between the peaks of  
144 hospitalization admission and SC2<sub>PMMoV</sub> concentrations for the two respective waves one and two.  
145 The subscript  $S$  denotes the state. The hospitalization peak date  $t_{hosp}$  is subtracted from the  
146 wastewater peak date  $t_{ww}$ , so that negative days signify an earlier peak date in wastewater

$$\Delta t_{peak,S} = t_{ww} - t_{hosp} \quad (4)$$

147 The emphasis in this analysis is on states with a population coverage of 15% or more (10 states).

148 We assume that this constraint ensures the representativeness of wastewater data for SARS-CoV-2

149 circulation. All analyses are performed with MATLAB 2023b, The MathWorks Inc.

150

151 2.5. Data dispersion analysis

152 SC2 and PMMoV concentrations - and as a result therefrom the normalized  $SC2_{PMMoV}$  - in

153 wastewater are characterized by substantial amounts of variability. Herein, data dispersion and

154 variability characteristics are examined to quantify WBE data attributes. Data variability is explored

155 for different sizes of WWTPs, where the proxy for plant size is given by the number of populations

156 that each plant serves. The population served by the plants varies significantly, with the smallest

157 plant serving approximately 5,000 individuals and the largest, a plant in Los Angeles, California,

158 serving 4 million individuals. This analysis aims to investigate whether there are significant

159 differences in data properties between small and large plants. It is hypothesized that differences in

160 concentration variability may be observed due to the substantial variation in plant size, spanning

161 three orders of magnitude.

162 To investigate the potential differences in concentration behavior between small and large

163 wastewater treatment plants, the WBE dataset is partitioned into five groups. The partitioning

164 regime is determined by quantile intervals of the population served. Data groups corresponding to

165 the five quantile intervals are denoted as  $Q_{0-0.2}$ ,  $Q_{0.2-0.4}$ , ...,  $Q_{0.8-1}$  (from smallest 20% of plants to

166 largest 20% of plants). Table 2 outlines the quantile intervals and data partitioning regime used for

167 this analysis. The grouping in the described manner is designed to partition plants into groups that

168 have similar sizes.

169 **Table 2:** Data partitioning into quantile ranges of plant sizes.

| Quantile ranges | Population served | #WWTPs | SC2 data points |
|-----------------|-------------------|--------|-----------------|
| $Q_{0-0.2}$     | 0-30,000          | 42     | 6278            |
| $Q_{0.2-0.4}$   | 30,001-64,000     | 34     | 4697            |
| $Q_{0.4-0.6}$   | 64,001-102,125    | 38     | 5632            |
| $Q_{0.6-0.8}$   | 102,126-227,238   | 38     | 6324            |
| $Q_{0.8-1}$     | 227,239-400,0000  | 38     | 6433            |

170

171 For each of the five data groups standard deviation (SD) and interquartile-ranges (IQR) are  
172 computed of the log<sub>10</sub> SC<sub>2</sub> concentrations. This enables a comparison of the degree of variability  
173 as a function of plant size. To test that the five data groups stem from different statistical populations,  
174 two-sided Wilcoxon rank sum tests are performed between adjacent data groups.

175  
176 3. Results

177 The COVID-19 epidemic in the timeframe May 2023 to June 2024 showed seasonal waves, similar  
178 to previous years [30]. This is shown in figure 2, plotting national aggregated daily SC<sub>2</sub><sub>PMMoV</sub>  
179 concentrations (and its 7-day moving average) along with hospitalization admissions in the US. This  
180 figure outlines the general development of the epidemic in the US in the studied timeframe. The two  
181 peaks are well pronounced in the national aggregated data. Reporting of SC<sub>2</sub> hospitalization data is  
182 discontinued from the beginning of May 2024 and therefore truncated in time in figure 2. The bottom  
183 bar chart outlines the number of WWTPs that are monitored at a particular day. On the right of the  
184 figure, a scatter plot depicts WBE and hospitalization admission data with a simple ordinary least  
185 squares (OLS) regression line.

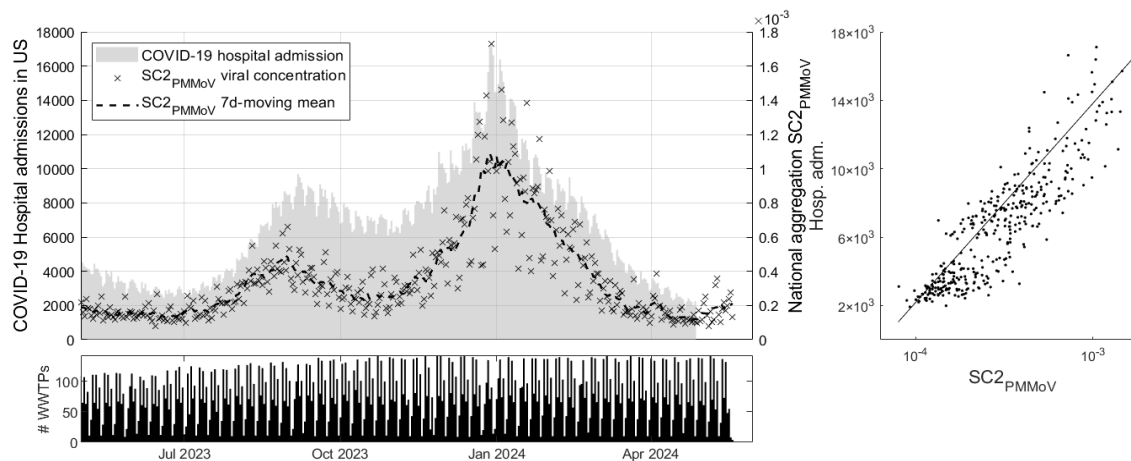

186  
187 **Figure 2:** National aggregation of SC<sub>2</sub><sub>PMMoV</sub> and COVID-19 hospitalization admissions (top left), number of WWTPs  
188 measured per day (bottom) and OLS regression between the datasets.

189 Figure 3 displays the histogram of all SC<sub>2</sub><sub>PMMoV</sub> data in the timeframe May 2023 to June 2024.  
190 Values above 3 standard deviations above the mean are discarded as systematic errors (27 data  
191 points out of 29,364). The mean normalized concentration is 0.00052 and the outlier threshold is  
192 0.012. Three standard deviations above the mean on the log<sub>10</sub> transformed data corresponds to a 24-  
193 fold higher concentration on linear scale in relation to the mean of the data.



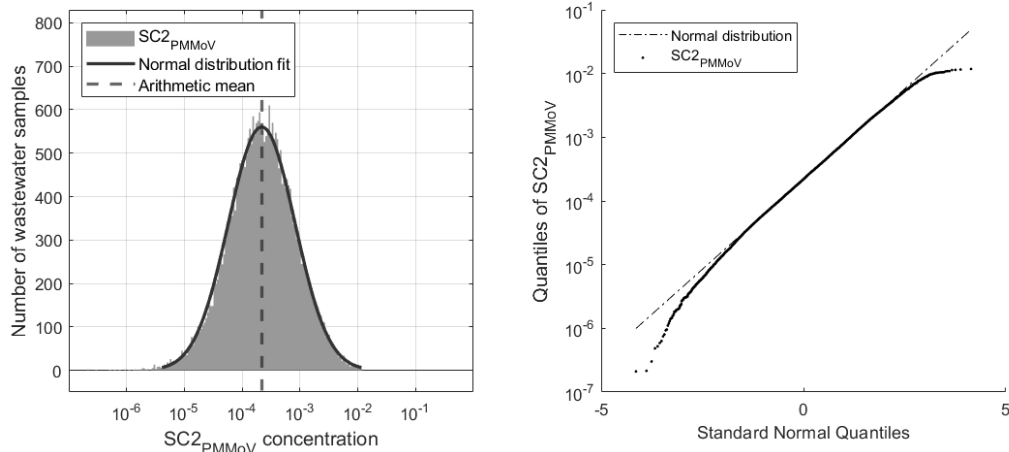

194  
195 **Figure 3:** SC2<sub>PMMoV</sub> data distribution and QQ-plot.  
196

197 In addition to the histogram on figure 3, a normal distribution fit is computed to outline the  
198 resemblance of the SC2<sub>PMMoV</sub> data with a log-normal distribution. To test the log<sub>10</sub> transformed data  
199 for normality, Shapiro-Wilk and Kolmogorov-Smirnov tests are performed with a 5% significance  
200 level each. Both tests reject the null hypothesis and suggest that the data are not normally distributed.  
201 Compared to an ideal log-normal distribution, the measured data are characterized by a fat tail on  
202 the left. Unlike the right side of the distribution, the left side is not truncated with a lower bound for  
203 outlier removal. Low/very low concentration values are not considered outliers. On the right graph  
204 of figure 3, the quantile-quantile (QQ) plot is depicted. It can be seen that both tails of the  
205 distribution deviate from the normal line. The data are characterized by a slight negative skew  
206 (skewness=-0.16).

### 207 3.1. Temporal analysis results

208 In epidemiological surveillance, early detection and rapid information processing are critical.  
209  
210 Temporal features of WBE SC2 monitoring, such as peak timing, cross-correlation lag and general  
211 wave development are analyzed. While other diseases like influenza or respiratory syncytial virus  
212 are characterized by clear onset/offset dates, SC2 is consistently circulating in the population since  
213 its outbreak in 2020 [31]. Therefore, peak occurrence timing is considered as the temporal feature  
214 for comparison. The COVID-19 epidemic in the US in the timeframe 2023-2024 was characterized  
215 by two waves. The peak of the first wave was less pronounced in SC2 concentration and  
216 hospitalization magnitude and occurred for most states in September 2023. The second wave

217 occurred around January 1<sup>st</sup> 2024. Figure 4 shows the cumulative occurrence of peaks in wastewater  
 218 and hospitalization data for each state and for both waves.

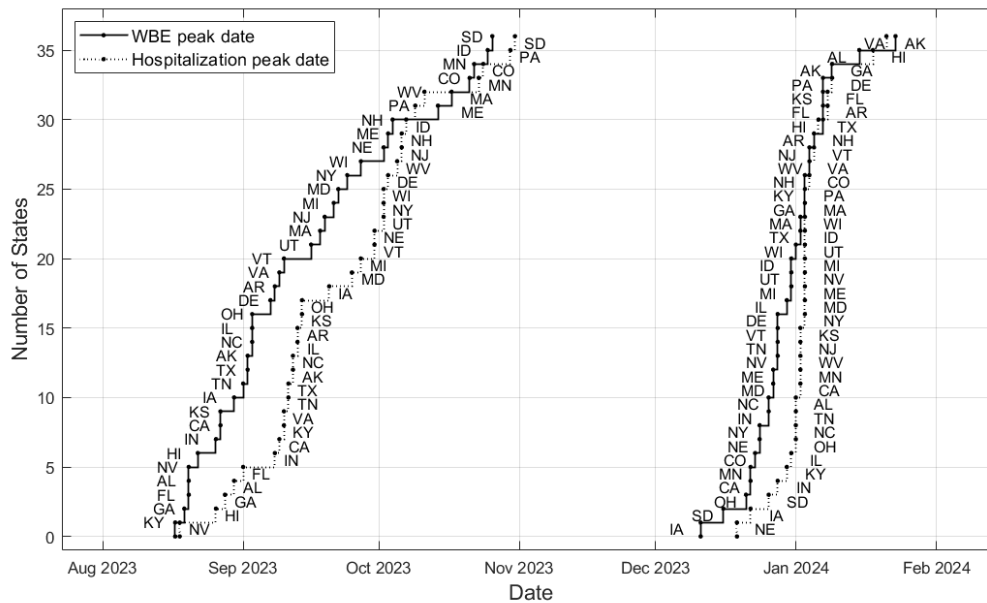

219  
 220 **Figure 4:** Cumulative number of States by peak occurrence, WBE and hospitalization admission. The abbreviation for  
 221 each state is provided next to its data point.

222 It can be seen in figure 4 that the WBE peak generally occurs earlier than the hospitalization peak.  
 223 The peak timings between hospitalization admission and SC<sub>2</sub> concentrations visually decrease  
 224 between the first and second wave. The second wave peaks across the US over a shorter time period.  
 225 Reasons for this could be an increased infectivity of the COVID-19 variant and/or a rise in  
 226 transmission due to more population mixing during the holiday travel. Spearman rank correlation  
 227 of the order in which the states occur is 0.91 for the first wave and 0.56 for the second wave. This  
 228 means that generally the order of occurrence of peaks is respected between the two data sets,  
 229 especially in the first wave. The first wave occurs earliest in the Southeastern region including the  
 230 states Kentucky, Georgia, Florida and Alabama, followed by Nevada, Hawaii and California among  
 231 others. The second wave peaks earliest in midwestern states including Iowa, South Dakota,  
 232 Minnesota, accompanied by Oklahoma, California and Nevada.

233 Figure 5 displays the state aggregated SC<sub>2</sub><sub>PMM0V</sub> concentrations and superimposed hospitalization  
 234 admission per 100k population (gray bars) for states with a population coverage of 15% or more.  
 235 SC<sub>2</sub><sub>PMM0V</sub> is shown on the left axis on log scale and hospitalization is shown on the right axis on  
 236 linear scale.

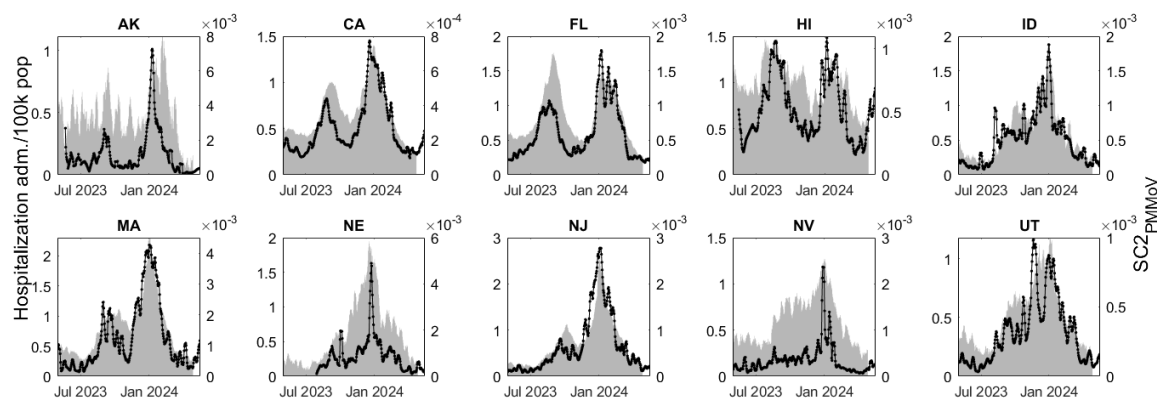

237

238

**Figure 5:** State aggregated  $SC2_{PMMoV}$  (black line) and hospitalization admission (gray bars).

239

240

241

242

243

244

Table 3 outlines the results of the temporal analysis. CCF lag between the time series (state aggregated  $SC2_{PMMoV}$  and hospitalization admission) and the time differential  $\overline{\Delta t}$  of the relative peak occurrence are listed. Negative values of CCF lag and  $\overline{\Delta t}$  indicate that the WBE peak occurred before the hospitalization peak. Furthermore, Spearman correlation  $r$  values are listed as a comparative analysis between  $SC2$  hospitalization admission and wastewater data for states with population coverage above 15%.

245

246

**Table 3:**  $SC2_{PMMoV}$  and hospitalization temporal quantitative feature comparison by state. Negative lag values indicate a time lead in wastewater over hospitalizations.

| State | $\overline{\Delta t}$ (d) | CCF lag | Spearman $r$ |
|-------|---------------------------|---------|--------------|
| CA    | -12                       | -3      | 0.88         |
| FL    | -6.5                      | -5      | 0.86         |
| HI    | -7.5                      | -10     | 0.62         |
| NJ    | -7.5                      | -4      | 0.93         |
| ID    | 7.5                       | -3      | 0.86         |
| MA    | -12                       | -4      | 0.83         |
| NE    | 3.5                       | 4       | 0.85         |
| UT    | -9.5                      | -5      | 0.86         |
| AK    | -11                       | -9      | 0.67         |
| NV    | -2                        | -2      | 0.76         |

247

248

249

250

251

252

253

$SC2$  in wastewater leads hospitalization admission in 8 out of 10 states, following the results of peak timing  $\overline{\Delta t}$ . For the CCF lag, 9 out of 10 states show this characteristic. A median time lead of 4 and 7.5 days is observed for CCF lag and  $\overline{\Delta t}$  respectively among states with 15% or more population coverage. The correlation metrics  $r$  and  $R^2$  suggest a close agreement between hospitalization admission and  $SC2_{PMMoV}$  in wastewater (median  $r=0.85$ ).

254 3.2. Data dispersion results

255 Differences in data dispersion characteristics for different plant sizes are observed. To examine the  
256 influence of plant size, the wastewater data are partitioned into 5 groups. The partitioning is  
257 governed by the quantiles of the population served by each plant and carried out as described in  
258 section 2.5.

259 Data dispersion results are listed in table 4 and visualized in figure 6. Table 4 describes data mean,  
260 median, standard deviation (SD) and interquartile range (IQR) of the partitioned data. The main  
261 measures of variability, SD and IQR, are observed to decrease with increasing plant size. This  
262 observation is in line with expectations, considering the more stochastic behavior of small plants  
263 and the law of large numbers. An intuitive explanation can be provided by considering a case  
264 prevalence of 0.1%. In a small plant serving 10,000 people, 10 individuals would be infected. Due  
265 to the size of the sewer system and the stochastic shedding behavior of these 10 infected individuals,  
266 SC2 concentrations may exhibit significant variability. Conversely, in a large WWTP serving a  
267 population of 1 million, 0.1% prevalence would correspond to 1,000 infected individuals. With a  
268 significant number of individuals shedding the virus, a more consistent discharge of the virus into  
269 the sewer system is likely. These findings align with the results from Nauta *et al.* [32], who  
270 performed Monte-Carlo simulations to estimate SC2 concentrations and data variability.

271 **Table 4:** Data dispersion properties  $\log_{10}(\text{SC2})$  mean, median, standard deviation and interquartile range by plant size.

| Quantile      | mean                    | median                  | SD                      | IQR                     |
|---------------|-------------------------|-------------------------|-------------------------|-------------------------|
| e             | $\log_{10}(\text{SC2})$ | $\log_{10}(\text{SC2})$ | $\log_{10}(\text{SC2})$ | $\log_{10}(\text{SC2})$ |
| $Q_{0-0.2}$   | 4.846                   | 4.862                   | 0.569                   | 0.781                   |
| $Q_{0.2-0.4}$ | 4.875                   | 4.877                   | 0.538                   | 0.735                   |
| $Q_{0.4-0.6}$ | 4.858                   | 4.854                   | 0.504                   | 0.687                   |
| $Q_{0.6-0.8}$ | 4.947                   | 4.942                   | 0.477                   | 0.643                   |
| $Q_{0.8-1}$   | 5.001                   | 5.026                   | 0.457                   | 0.612                   |

272 Figure 6 visualizes the data dispersion as a function of plant size. On the left, a boxplot diagram  
273 displays data median, upper and lower quartiles and minimum/maximum values by whiskers. The  
274 graph shows consistent decrease of data range and variability with the increase in plant size. On the  
275 right of figure 6 aggregated time-series are graphed, corresponding to  $Q_{0-0.2}$  (top, small plants) and  
276  $Q_{0.8-1}$  (bottom, big plants). The ordinate axes are scaled equally for comparison.  
277

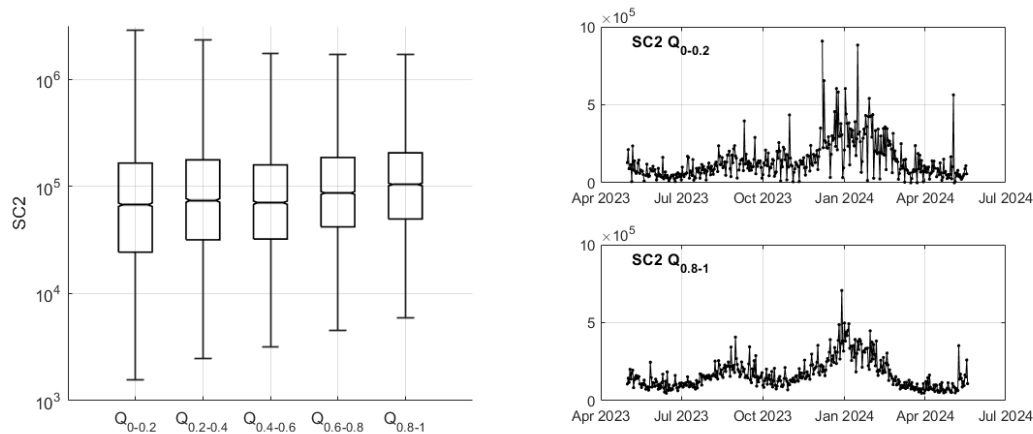

278

279

**Figure 6:** Data variability by quantile grouped data of different WWTPs sizes.

280

281

To test the hypothesis that the partitioned wastewater groups based on plant size originate from statistically different data populations, two-sided Wilcoxon rank sum tests are performed. Four tests are carried out among the five groups between the adjacent groups. All tests reject the null hypothesis (that they stem from the same data population). All tests recommended to accept the alternative hypothesis (that they stem from different data populations) supports the thesis that there are underlying differences in data variability as a function of plant size. These findings can help public health officials interpret the significance of changes in WBE signals by taking into consideration the underlying population size contributing to the sewershed.

289

#### 290 4. Conclusion

291

The COVID-19 epidemic in the US showed seasonality characteristics, that is periods of high and periods of low viral abundance in the population. The epidemic burden on the general population was lower – considering that case fatality was 60% lower in the studied timeframe, compared to the same season one-year earlier [2]. Since the initial outbreak in 2020, an average of two peak seasons per year have occurred [2]. The waves are observable in case data, hospitalization data and the SARS-CoV-2 RNA concentration in wastewater [30]. With the exception of the peak in January 2022 (which is the highest in the US), the weekly hospital admissions show decreasing peak amplitude over time for each consecutive occurring wave [2]. The increasing population contamination, the rise in vaccination levels and the changing SARS-CoV-2 variants with less severe symptoms led to greater resilience of society to the impacts of the epidemic.

300

301 This work investigates the SARS-CoV-2 RNA concentration data in US wastewater in the 2023-  
302 2024 season. Periodical waves characterizing the epidemic are observable. Clinical COVID-19 case  
303 reporting has largely been discontinued as of March 2024 [2, 33, 34]; hospitalization data reporting  
304 has been discontinued in early May 2024. In contrast, SARS-CoV-2 wastewater surveillance  
305 endeavors (among other pathogens) are well established and provide valuable information.  
306 The work at hand examines statistical attributes of SARS-CoV-2 concentrations derived from  
307 wastewater surveillance. Firstly, temporal features, such as peak timing and CCF lag in the data are  
308 analyzed and compared to hospitalization admissions. The observations show that viral abundance  
309 in wastewater leads hospitalization admission between 2 and 12 days, in states with a population  
310 coverage of 15% or more. Data variability is analyzed and the influence of plant size on data  
311 dispersion has been observed, with the results demonstrating that smaller plants are subject to  
312 significantly more data variability. By partitioning the data into five batches based on plant size, a  
313 decrease in data variability with increased plant size is observed.

314  
315 **Acknowledgement:**

316 We acknowledge all the wastewater treatment plant staff who provided samples for this project.

317 **References**

- 318 [1] WHO, <https://www.who.int/>: Date of retrieval 06-01-2024.  
319 [2] CDC, <https://covid.cdc.gov/covid-data-tracker/#datatracker-home>: Date of retrieval 06-01-2024.  
320 [3] CDC, <https://www.cdc.gov/covid/hcp/testing/index.html>: Date of retrieval 06-01-2024.  
321 [4] C. G. Daughton, "Wastewater surveillance for population-wide Covid-19: The present and  
322 future," *The Science of the total environment*, vol. 736, p. 139631, 2020, doi:  
323 10.1016/j.scitotenv.2020.139631.  
324 [5] A. B. Boehm, M. K. Wolfe, B. White, B. Hughes, and D. Duong, "Divergence of wastewater  
325 SARS-CoV-2 and reported laboratory-confirmed COVID-19 incident case data coincident with  
326 wide-spread availability of at-home COVID-19 antigen tests," *PeerJ*, vol. 11, e15631, 2023, doi:  
327 10.7717/peerj.15631.  
328 [6] J. S. McClary-Gutierrez *et al.*, "SARS-CoV-2 Wastewater Surveillance for Public Health  
329 Action," *Emerging infectious diseases*, vol. 27, no. 9, pp. 1–8, 2021, doi:  
330 10.3201/eid2709.210753.  
331 [7] R. Wölfel *et al.*, "Virological assessment of hospitalized patients with COVID-2019," *Nature*,  
332 vol. 581, no. 7809, pp. 465–469, 2020, doi: 10.1038/s41586-020-2196-x.  
333 [8] G. Medema, L. Heijnen, G. Elsinga, R. Italiaander, and A. Brouwer, "Presence of SARS-  
334 Coronavirus-2 RNA in Sewage and Correlation with Reported COVID-19 Prevalence in the  
335 Early Stage of the Epidemic in The Netherlands," *Environmental science & technology letters*,  
336 vol. 7, no. 7, pp. 511–516, 2020, doi: 10.1021/acs.estlett.0c00357.  
337 [9] W. Ahmed *et al.*, "First confirmed detection of SARS-CoV-2 in untreated wastewater in  
338 Australia: A proof of concept for the wastewater surveillance of COVID-19 in the community,"

- 339 *The Science of the total environment*, vol. 728, p. 138764, 2020, doi:  
340 10.1016/j.scitotenv.2020.138764.
- 341 [10] G. La Rosa *et al.*, "First detection of SARS-CoV-2 in untreated wastewaters in Italy," *The*  
342 *Science of the total environment*, vol. 736, p. 139652, 2020, doi:  
343 10.1016/j.scitotenv.2020.139652.
- 344 [11] W. Lodder and A. M. de Roda Husman, "SARS-CoV-2 in wastewater: potential health risk, but  
345 also data source," *The lancet. Gastroenterology & hepatology*, vol. 5, no. 6, pp. 533–534, 2020,  
346 doi: 10.1016/S2468-1253(20)30087-X.
- 347 [12] W. Randazzo, P. Truchado, E. Cuevas-Ferrando, P. Simón, A. Allende, and G. Sánchez, "SARS-  
348 CoV-2 RNA in wastewater anticipated COVID-19 occurrence in a low prevalence area," *Water*  
349 *research*, vol. 181, p. 115942, 2020, doi: 10.1016/j.watres.2020.115942.
- 350 [13] K. E. Graham *et al.*, "SARS-CoV-2 RNA in Wastewater Settled Solids Is Associated with  
351 COVID-19 Cases in a Large Urban Sewershed," *Environmental science & technology*, vol. 55,  
352 no. 1, pp. 488–498, 2021, doi: 10.1021/acs.est.0c06191.
- 353 [14] J. Peccia *et al.*, "Measurement of SARS-CoV-2 RNA in wastewater tracks community infection  
354 dynamics," *Nature biotechnology*, vol. 38, no. 10, pp. 1164–1167, 2020, doi: 10.1038/s41587-  
355 020-0684-z.
- 356 [15] E. M. G. Chan, A. Bidwell, Z. Li, S. Tilmans, and A. B. Boehm, "Public health policy impact  
357 evaluation: A potential use case for longitudinal monitoring of viruses in wastewater at small  
358 geographic scales," *PLOS Water*, vol. 3, no. 6, e0000242, 2024, doi:  
359 10.1371/journal.pwat.0000242.
- 360 [16] M. K. Wolfe *et al.*, "Detection of Hemagglutinin H5 Influenza A Virus Sequence in Municipal  
361 Wastewater Solids at Wastewater Treatment Plants with Increases in Influenza A in Spring,  
362 2024," *Environmental science & technology letters*, 2024, doi: 10.1021/acs.estlett.4c00331.
- 363 [17] M. K. Wolfe *et al.*, "Wastewater Detection of Emerging Arbovirus Infections: Case Study of  
364 Dengue in the United States," *Environmental science & technology letters*, vol. 11, no. 1, pp. 9–  
365 15, 2024, doi: 10.1021/acs.estlett.3c00769.
- 366 [18] A. Zulli *et al.*, "Prospective study of *Candida auris* nucleic acids in wastewater solids in 190  
367 wastewater treatment plants in the United States suggests widespread occurrence," *mBio*, vol. 15,  
368 no. 8, e0090824, 2024, doi: 10.1128/mbio.00908-24.
- 369 [19] E. H. Kaplan, D. Wang, M. Wang, A. A. Malik, A. Zulli, and J. Peccia, "Aligning SARS-CoV-2  
370 indicators via an epidemic model: application to hospital admissions and RNA detection in  
371 sewage sludge," *Health care management science*, vol. 24, no. 2, pp. 320–329, 2021, doi:  
372 10.1007/s10729-020-09525-1.
- 373 [20] A. Galani *et al.*, "SARS-CoV-2 wastewater surveillance data can predict hospitalizations and  
374 ICU admissions," *The Science of the total environment*, vol. 804, p. 150151, 2022, doi:  
375 10.1016/j.scitotenv.2021.150151.
- 376 [21] H. Schenk *et al.*, "Prediction of hospitalisations based on wastewater-based SARS-CoV-2  
377 epidemiology," *The Science of the total environment*, vol. 873, p. 162149, 2023, doi:  
378 10.1016/j.scitotenv.2023.162149.
- 379 [22] X. Li *et al.*, "Wastewater-based epidemiology predicts COVID-19-induced weekly new hospital  
380 admissions in over 150 USA counties," *Nature communications*, vol. 14, no. 1, p. 4548, 2023,  
381 doi: 10.1038/s41467-023-40305-x.
- 382 [23] Bibby K., A. Bivins, Z. Wu, and D. North, "Making waves: Plausible lead time for wastewater  
383 based epidemiology as an early warning system for COVID-19," *Water research*, vol. 202, p.  
384 117438, 2021, doi: 10.1016/j.watres.2021.117438.
- 385 [24] S. W. Olesen, M. Imakaev, and C. Duvallet, "Making waves: Defining the lead time of  
386 wastewater-based epidemiology for COVID-19," *Water research*, vol. 202, p. 117433, 2021, doi:  
387 10.1016/j.watres.2021.117433.
- 388 [25] A. B. Boehm *et al.*, "Human viral nucleic acids concentrations in wastewater solids from Central  
389 and Coastal California USA," *Scientific data*, vol. 10, no. 1, p. 396, 2023, doi: 10.1038/s41597-  
390 023-02297-7.

- 391 [26] WastewaterSCAN, <https://data.wastewaterscan.org/>: Date of retrieval 06-01-2024.
- 392 [27] A. B. Boehm *et al.*, "Human pathogen nucleic acids in wastewater solids from 191 wastewater  
393 treatment plants in the United States.," *Submitted*.
- 394 [28] P. J. Arts *et al.*, "Longitudinal and quantitative fecal shedding dynamics of SARS-CoV-2, pepper  
395 mild mottle virus, and crAssphage," *mSphere*, vol. 8, no. 4, e0013223, 2023, doi:  
396 10.1128/msphere.00132-23.
- 397 [29] M. K. Wolfe *et al.*, "Scaling of SARS-CoV-2 RNA in Settled Solids from Multiple Wastewater  
398 Treatment Plants to Compare Incidence Rates of Laboratory-Confirmed COVID-19 in Their  
399 Sewersheds," *Environmental science & technology letters*, vol. 8, no. 5, pp. 398–404, 2021, doi:  
400 10.1021/acs.estlett.1c00184.
- 401 [30] C. Duvallet *et al.*, "Nationwide Trends in COVID-19 Cases and SARS-CoV-2 RNA Wastewater  
402 Concentrations in the United States," *ACS ES&T water*, vol. 2, no. 11, pp. 1899–1909, 2022, doi:  
403 10.1021/acsestwater.1c00434.
- 404 [31] A. Zulli, M. R. J. Varkila, J. Parsonnet, M. K. Wolfe, and A. B. Boehm, "Observations of  
405 Respiratory Syncytial Virus (RSV) Nucleic Acids in Wastewater Solids Across the United States  
406 in the 2022-2023 Season: Relationships with RSV Infection Positivity and Hospitalization  
407 Rates," *ACS ES&T water*, vol. 4, no. 4, pp. 1657–1667, 2024, doi: 10.1021/acsestwater.3c00725.
- 408 [32] M. Nauta *et al.*, "Early detection of local SARS-CoV-2 outbreaks by wastewater surveillance: a  
409 feasibility study," *Epidemiology and infection*, vol. 151, e28, 2023, doi:  
410 10.1017/S0950268823000146.
- 411 [33] John Hopkins University & Medicine, <https://coronavirus.jhu.edu/map.html>. Date of retrieval 31-  
412 07-2024.
- 413 [34] New York Times, <https://www.nytimes.com/interactive/2021/us/covid-cases.html>. Date of  
414 retrieval 31-07-2024.
